# Supplementary material
Source: PubMed Central journal article supplement (PMC7974711)
Supplement: aim-olf-L210116-L21-0116_Supplement.pdf [file aim-olf-L210116-L21-0116_Supplement.pdf]

## Supplementary Material\*

Chou R, Dana T, Jungbauer R, et al. Update alert 5: masks for prevention of respiratory virus infections, including SARS-CoV-2, in health care and community settings. *Ann Intern Med*. 9 March 2021. [Epub ahead of print]. doi:10.7326/L21-0116

*Supplement Table 1.* Characteristics of New Observational Studies of Mask Use—Update Alert 5

*Supplement Table 2.* Quality Assessment of New Observational Studies of Mask Use—Update Alert 5

*Supplement Table 3.* Mask Use and Risk for SARS-CoV-2 Infection

*Supplement Table 4.* Masks for Prevention of Respiratory Virus Infections Evidence Map—Update Alert 5

References

\*This supplementary material was provided by the authors to give readers further details on their article. The material was reviewed but not copyedited.

**Supplement Table 1. Characteristics of New Observational Studies of Mask Use—Update Alert 5**

| <b>Author, year<br/>Country<br/>Study<br/>design</b>                               | <b>Inclusion criteria</b>                                                                                               | <b>Sample size</b> | <b>Age</b>                                                                                                                                      | <b>Female (%)</b> | <b>Definition of infection</b> |
|------------------------------------------------------------------------------------|-------------------------------------------------------------------------------------------------------------------------|--------------------|-------------------------------------------------------------------------------------------------------------------------------------------------|-------------------|--------------------------------|
| <b><i>Community setting</i></b>                                                    |                                                                                                                         |                    |                                                                                                                                                 |                   |                                |
| van den Broek-Altenburg et al 2021 (2)<br><br>United States<br><br>Cross-sectional | Community members from Chittenden (VT) county who had an encounter with their primary care provider in the past 3 years | 454                | Mean 51 years                                                                                                                                   | 60%               | SARS-CoV-2 seropositivity      |
| <b><i>Healthcare setting</i></b>                                                   |                                                                                                                         |                    |                                                                                                                                                 |                   |                                |
| Venugopal et al 2021 (3)<br><br>United States<br><br>Cross-sectional               | Healthcare workers at a Level 1 trauma center                                                                           | 500                | Mean not reported<br><ul style="list-style-type: none"> <li>• 20-39 years: 48%</li> <li>• 40-59 years: 41%</li> <li>• ≥60 years: 11%</li> </ul> | 69%               | SARS-CoV-2 seropositivity      |

Abbreviations: SARS-CoV-2 = severe acute respiratory syndrome coronavirus 2

**Supplement Table 2. Quality Assessment of New Observational Studies of Mask Use—Update Alert 5**

| <b>Author, year</b>                    | <b>Did the study attempt to enroll all (or a random sample of) patients meeting inclusion criteria (inception cohort)?</b> | <b>Did the study use accurate methods for ascertaining exposures and potential confounders?</b> | <b>Were outcome assessors and/or data analysts blinded to exposure being studied?</b> | <b>Did the article report attrition or missing data?</b> | <b>Is there high attrition or missing data?</b> | <b>Were outcomes pre-specified and defined, and ascertained using accurate methods?</b> | <b>Other sources of potential bias</b>                                                                                        | <b>Quality rating</b> |
|----------------------------------------|----------------------------------------------------------------------------------------------------------------------------|-------------------------------------------------------------------------------------------------|---------------------------------------------------------------------------------------|----------------------------------------------------------|-------------------------------------------------|-----------------------------------------------------------------------------------------|-------------------------------------------------------------------------------------------------------------------------------|-----------------------|
| <b>Community setting</b>               |                                                                                                                            |                                                                                                 |                                                                                       |                                                          |                                                 |                                                                                         |                                                                                                                               |                       |
| van den Broek-Altenburg et al 2021 (2) | Yes                                                                                                                        | No (potential recall bias)                                                                      | No                                                                                    | No                                                       | Unclear                                         | Yes                                                                                     | Potential selection bias; survey participation rate 14% of initial sample; SARS-CoV-2 testing rate 26% of survey participants | Fair                  |
| <b>Healthcare setting</b>              |                                                                                                                            |                                                                                                 |                                                                                       |                                                          |                                                 |                                                                                         |                                                                                                                               |                       |
| Venugopal et al 2021 (3)               | Yes                                                                                                                        | No (potential recall bias)                                                                      | Unclear                                                                               | No                                                       | Unclear                                         | Yes                                                                                     | No control for confounders                                                                                                    | Fair                  |

**Supplement Table 3. Mask Use and Risk for SARS-CoV-2 Infection**

| Author, Year (Reference)                                                       | Mask Use Versus Nonuse                                                                                                                                                                                                                                                                                                                                                                                                                  | Comparison of Mask Types                                                                                                                      | Consistency of Mask Use                                                                                                                                                                                                                                                                                                                                         | Multiple Mask Layers Versus Single Layer |
|--------------------------------------------------------------------------------|-----------------------------------------------------------------------------------------------------------------------------------------------------------------------------------------------------------------------------------------------------------------------------------------------------------------------------------------------------------------------------------------------------------------------------------------|-----------------------------------------------------------------------------------------------------------------------------------------------|-----------------------------------------------------------------------------------------------------------------------------------------------------------------------------------------------------------------------------------------------------------------------------------------------------------------------------------------------------------------|------------------------------------------|
| <b>Community setting</b>                                                       |                                                                                                                                                                                                                                                                                                                                                                                                                                         |                                                                                                                                               |                                                                                                                                                                                                                                                                                                                                                                 |                                          |
| Bundgaard et al 2020 (4)                                                       | Surgical mask vs. no mask: OR 0.82 (95% CI 0.52 to 1.23)                                                                                                                                                                                                                                                                                                                                                                                | --                                                                                                                                            | --                                                                                                                                                                                                                                                                                                                                                              | --                                       |
| Doung-Ngern et al, 2020 (5)                                                    | Surgical (medical) mask vs. no mask: adjusted OR 0.25 (95% CI 0.12 to 0.53)<br><br>Cloth (nonmedical) mask vs. no mask: adjusted OR 0.78 (95% CI 0.32 to 1.90)<br><br>Any mask vs. no mask: adjusted OR 0.46 (95% CI 0.13 to 1.64)                                                                                                                                                                                                      | Surgical (medical) mask vs. cloth (nonmedical) mask: OR 1.06 (95% CI 0.63 to 1.79)*<br><br>Mask type and risk of SARS-CoV-2 infection: p=0.54 | Always wearing a mask vs. not wearing a mask: <b>adjusted OR 0.23 (95% CI 0.09 to 0.60)</b><br><br>Sometimes wearing a mask vs. not wearing a mask: adjusted OR 0.87 (95% CI 0.41 to 1.84)                                                                                                                                                                      | --                                       |
| van den Broek-Altenburg et al 2021 (2)<br><br><b>Added for Update Alert #5</b> | Mask use outside of work (yes vs. no): OR 2.35 (0.67-8.25)                                                                                                                                                                                                                                                                                                                                                                              | --                                                                                                                                            | --                                                                                                                                                                                                                                                                                                                                                              | --                                       |
| Wang Y et al, 2002 (6)<br><br>China<br><br>Cohort                              | Unadjusted OR (95% CI) for household with secondary infection of family member<br>Mask use all the time by:<br>• All family members (including index case) vs. no family members before index case illness onset: 0.20 (0.07 to 0.60)<br>• Some family members vs. no family members: 0.72 (0.30-1.73)<br>• At least one family member (including index case) vs. no family members prior to index case illness onset: 0.22 (0.07-0.69) | -                                                                                                                                             | Unadjusted OR (95% CI) for household with secondary infection of family member<br>Primary case or family members wore mask (N95, surgical, or cloth) after index case illness onset:<br>• All the time vs. never: 0.30 (0.11-0.82)<br>• Sometimes vs. never: 1.15 (0.11-0.82)<br><br>Mask use after index case symptom onset not included in multivariate model | -                                        |

| Author, Year (Reference)    | Mask Use Versus Nonuse                                                                                                                                                                                                                                                       | Comparison of Mask Types                                       | Consistency of Mask Use                                                                                                                                                              | Multiple Mask Layers Versus Single Layer |
|-----------------------------|------------------------------------------------------------------------------------------------------------------------------------------------------------------------------------------------------------------------------------------------------------------------------|----------------------------------------------------------------|--------------------------------------------------------------------------------------------------------------------------------------------------------------------------------------|------------------------------------------|
|                             | Adjusted OR (95% CI) for household with secondary infection of family member <ul style="list-style-type: none"> <li>• Mask use all the time by at least one family member or index case vs. no family members prior to index case illness onset: 0.21 (0.06-0.79)</li> </ul> |                                                                |                                                                                                                                                                                      |                                          |
| <b>Healthcare setting</b>   |                                                                                                                                                                                                                                                                              |                                                                |                                                                                                                                                                                      |                                          |
| Akinbami et al 2020 (7)     | --                                                                                                                                                                                                                                                                           | --                                                             | Always use N95 vs. less than always: <b>adjusted OR 0.83 (0.72-0.95)</b><br><br>Always use surgical mask vs. less than always: <b>adjusted OR 0.86 (0.75-0.98)</b>                   | --                                       |
| Chatterjee et al, 2020 (8)  | Any mask vs. no mask: <b>OR 0.35 (0.22-0.57)*</b>                                                                                                                                                                                                                            | --                                                             | --                                                                                                                                                                                   | --                                       |
| Heinzerling et al, 2020 (9) | --                                                                                                                                                                                                                                                                           | --                                                             | Always facemask (non-N95) during aerosol generating procedures: OR 0.77 (0.03-20.02)<br><br>Always facemask (non-N95) during non-aerosol generating procedures: OR 1.29 (0.05-30.38) | --                                       |
| Khalil et al, 2020 (10)     | Medical/surgical mask (yes vs. no): 1.40 (0.30-6.42)                                                                                                                                                                                                                         | --                                                             | --                                                                                                                                                                                   | --                                       |
| Piapan et al, 2020 (11)     | Mask (FFP2-3 or surgical) vs. no mask: adjusted OR 1.6 (0.9-2.9)                                                                                                                                                                                                             | FFP2 mask vs. surgical mask: <b>adjusted OR 7.1 (3.6-13.9)</b> | --                                                                                                                                                                                   | --                                       |

| Author, Year (Reference)                                         | Mask Use Versus Nonuse                                                                                                                                                                                                               | Comparison of Mask Types                             | Consistency of Mask Use | Multiple Mask Layers Versus Single Layer |
|------------------------------------------------------------------|--------------------------------------------------------------------------------------------------------------------------------------------------------------------------------------------------------------------------------------|------------------------------------------------------|-------------------------|------------------------------------------|
| Sims et al 2020 (12)                                             | Any mask vs. no mask: <b>OR 0.58 (0.50-0.66)</b><br><br>N95 or surgical mask vs. no mask: <b>OR 0.57 (0.50-0.66)</b><br><br>N95 vs. no mask: <b>OR 0.54 (0.47-0.62)</b><br><br>Surgical mask vs. no mask: <b>OR 0.71 (0.58-0.86)</b> | N95 vs. surgical mask: <b>OR 0.76 (0.63-0.92)</b>    | --                      | --                                       |
| Venugopal et al 2021 (3)<br><br><b>Added for Update Alert #5</b> | N95 only (yes vs. no): OR 0.87 (0.50-1.54)*<br><br>Surgical mask only (yes vs. no): OR 1.70 (1.08-2.69)*<br><br>N95 and surgical mask (yes vs. no): OR 0.64 (0.41-1.00)*                                                             | N95 only vs. surgical mask only: OR 0.60 (0.31-1.15) | --                      | --                                       |
| Wang X. et al, 2020 (13)                                         | In department with mask use (no vs. yes): <b>adjusted OR 464.82 (97.73- ∞)</b>                                                                                                                                                       | --                                                   | --                      | --                                       |

\*Variable not included in a multivariate model

**Supplement Table 4. Masks for Prevention of Respiratory Virus Infections Evidence Map—Update Alert 5**

| Comparison (intervention A vs. intervention B)                                                                                                                                                                                                                                                                                                    | SARS-CoV-2 infection | SARS-CoV-1 or MERS-CoV infection † | Influenza, influenzalike illness, and other viral respiratory illness (excluding pandemic coronaviruses) ‡ |
|---------------------------------------------------------------------------------------------------------------------------------------------------------------------------------------------------------------------------------------------------------------------------------------------------------------------------------------------------|----------------------|------------------------------------|------------------------------------------------------------------------------------------------------------|
| <b>Community setting</b>                                                                                                                                                                                                                                                                                                                          |                      |                                    |                                                                                                            |
| <b>Mask (type not specified) vs. no mask in households with an index case and other community settings</b> <ul style="list-style-type: none"> <li>• SARS-CoV-2*: 1 RCT (4) and 3 observational studies (2, 5, 6)</li> <li>• SARS-CoV-1/MERS-CoV: 3 observational studies (14-16)</li> </ul>                                                       | ◆                    | ◆                                  | -                                                                                                          |
| <b>N95<sup>§</sup> vs. surgical mask in household contacts</b> <ul style="list-style-type: none"> <li>• SARS-CoV-2: no studies</li> <li>• SARS-CoV-1/MERS-CoV: no studies</li> <li>• Influenza, influenzalike illness or other viral respiratory illness: 1 RCT (17)</li> </ul>                                                                   | -                    | -                                  | ◆                                                                                                          |
| <b>N95<sup>§</sup> vs. no mask in household contacts</b> <ul style="list-style-type: none"> <li>• SARS-CoV-2: no studies</li> <li>• SARS-CoV-1/MERS-CoV: no studies</li> <li>• Influenza, influenzalike illness or other viral respiratory illness: 1 RCT (17)</li> </ul>                                                                         | -                    | -                                  | ◆                                                                                                          |
| <b>Surgical mask vs. no mask in households with an index case and other community settings</b> <ul style="list-style-type: none"> <li>• SARS-CoV-2: 1 RCT (4) and 1 observational study (5)</li> <li>• SARS-CoV-1/MERS-CoV: no studies</li> <li>• Influenza, influenzalike illness or other viral respiratory illness: 12 RCTs (17-27)</li> </ul> | ◆                    | -                                  | ●                                                                                                          |
| <b>Cloth mask vs. no mask in community contacts</b> <ul style="list-style-type: none"> <li>• SARS-CoV-2: 1 observational study (5)</li> <li>• SARS-CoV-1/MERS-CoV: no studies</li> <li>• Influenza, influenzalike illness or other viral respiratory illness: no studies</li> </ul>                                                               | ■                    | -                                  | -                                                                                                          |
| <b>Healthcare setting – moderate or higher risk (inpatient)</b>                                                                                                                                                                                                                                                                                   |                      |                                    |                                                                                                            |
| <b>Any mask vs. no mask</b> <ul style="list-style-type: none"> <li>• SARS-CoV-2: 2 observational studies (8, 12)</li> <li>• SARS-CoV-1/MERS-CoV: 12 observational studies (28-39)</li> <li>• Influenza, influenzalike illness or other viral respiratory illness: no studies</li> </ul>                                                           | ■                    | ●                                  | -                                                                                                          |

| Comparison (intervention A vs. intervention B)                                                                                                                                                                                                                                                                  | SARS-CoV-2 infection | SARS-CoV-1 or MERS-CoV infection † | Influenza, influenzalike illness, and other viral respiratory illness (excluding pandemic coronaviruses) ‡ |
|-----------------------------------------------------------------------------------------------------------------------------------------------------------------------------------------------------------------------------------------------------------------------------------------------------------------|----------------------|------------------------------------|------------------------------------------------------------------------------------------------------------|
| <b>N95 vs. no mask</b> <ul style="list-style-type: none"> <li>SARS-CoV-2*: 3 observational studies (3, 12, 13)</li> <li>SARS-CoV-1/MERS-CoV: 4 observational studies (28, 34-36)</li> <li>Influenza, influenzalike illness or other viral respiratory illness: no studies</li> </ul>                            | ■                    | ◆                                  | -                                                                                                          |
| <b>Surgical mask vs. no mask</b> <ul style="list-style-type: none"> <li>SARS-CoV-2*: k=3 observational studies (3, 10, 12)</li> <li>SARS-CoV-1/MERS-CoV: k=6 observational studies (28, 29, 31, 34, 35, 38)</li> <li>Influenza, influenzalike illness or other viral respiratory illness: no studies</li> </ul> | ■                    | ■                                  | -                                                                                                          |
| <b>N95 or surgical mask vs. no mask</b> <ul style="list-style-type: none"> <li>SARS-CoV-2* k=1 observational study (12)</li> <li>SARS-CoV-1/MERS/CoV: k=1 observational study (39)</li> <li>Influenza, influenzalike illness or other viral respiratory illness: no studies</li> </ul>                          | ■                    | ■                                  | -                                                                                                          |
| <b>N95 and surgical mask vs. no mask</b> <ul style="list-style-type: none"> <li>SARS-CoV-2*: k=1 observational study (3)</li> <li>SARS-CoV-1/MERS/CoV: no studies</li> <li>Influenza, influenzalike illness or other viral respiratory illness: no studies</li> </ul>                                           | ■                    | -                                  | -                                                                                                          |
| <b>Mask (type not specified) vs. no mask</b> <ul style="list-style-type: none"> <li>SARS-CoV-2: no studies</li> <li>SARS-CoV-1/MERS-CoV: k=5 observational studies (30, 32, 35, 37, 38)</li> <li>Influenza, influenzalike illness or other viral respiratory illness: no studies</li> </ul>                     | -                    | ◆                                  | -                                                                                                          |
| <b>Cloth mask vs. no mask</b> <ul style="list-style-type: none"> <li>SARS-CoV-2: no studies</li> <li>SARS-CoV-1/MERS-CoV: k=3 observational studies (28, 33, 38)</li> <li>Influenza, influenzalike illness or other viral respiratory illness: no studies</li> </ul>                                            | -                    | ■                                  | -                                                                                                          |



| <b>Comparison (intervention A vs. intervention B)</b>                                                                                                                                                                                                                                                                   | <b>SARS-CoV-2 infection</b> | <b>SARS-CoV-1 or MERS-CoV infection †</b> | <b>Influenza, influenzalike illness, and other viral respiratory illness (excluding pandemic coronaviruses) ‡</b> |
|-------------------------------------------------------------------------------------------------------------------------------------------------------------------------------------------------------------------------------------------------------------------------------------------------------------------------|-----------------------------|-------------------------------------------|-------------------------------------------------------------------------------------------------------------------|
| <b>Consistent/always mask use vs. inconsistent mask use</b> <ul style="list-style-type: none"> <li>SARS-CoV-2: k=1 observational study (7)</li> <li>SARS-CoV-1/MERS-CoV: k=4 observational studies (29, 32, 40, 41)</li> <li>Influenza, influenzalike illness or other viral respiratory illness: no studies</li> </ul> | ■                           | ◆                                         | -                                                                                                                 |
| <b>N95 vs. surgical mask</b> <ul style="list-style-type: none"> <li>SARS-CoV-2*: k=3 observational studies (3, 11, 12)</li> <li>SARS-CoV-1/MERS-CoV: k=5 observational studies (28, 29, 34, 39, 42)</li> <li>Influenza, influenzalike illness or other viral respiratory illness: k=3 RCTs (43-45)</li> </ul>           | ■                           | ◆                                         | ●                                                                                                                 |
| <b>N95 or surgical mask vs. cloth mask</b> <ul style="list-style-type: none"> <li>SARS-CoV-2: no studies</li> <li>SARS-CoV-1/MERS-CoV: k=3 observational studies (28, 30, 38)</li> <li>Influenza, influenzalike illness or other viral respiratory illness: no studies</li> </ul>                                       | -                           | ■                                         | -                                                                                                                 |
| <b>Surgical mask vs. cloth mask</b> <ul style="list-style-type: none"> <li>SARS-CoV-2: no studies</li> <li>SARS-CoV-1/MERS-CoV: no studies</li> <li>Influenza, influenzalike illness or other viral respiratory illness: k=1 RCT (46)</li> </ul>                                                                        | -                           | -                                         | ◆                                                                                                                 |
| <b>Healthcare setting – lower risk (outpatient)</b>                                                                                                                                                                                                                                                                     |                             |                                           |                                                                                                                   |
| <b>N95 vs. surgical mask</b> <ul style="list-style-type: none"> <li>SARS-CoV-2: no studies</li> <li>SARS-CoV-1/MERS-CoV: no studies</li> <li>Influenza, influenzalike illness or other viral respiratory illness: k=1 RCT (47)</li> </ul>                                                                               | -                           | -                                         | ●                                                                                                                 |

\* New evidence added for Update Alert #5; † Only observational evidence was included for these infections; ‡ Only RCT evidence was included for these infections§ N95 or equivalent (e.g. P2 mask)

**Strength of evidence**

- Moderate
- ◆ Low
- Insufficient
- No evidence

**Direction of effect**

-  Favors intervention A
-  Effects similar or no difference
-  No or too little evidence to determine

## References

1. Chou R, Dana T, Jungbauer R, et al. Masks for prevention of respiratory virus infections, including SARS-CoV-2, in health care and community settings : A living rapid review. *Ann Intern Med.* 2020;173(7):542-55. Epub 2020/06/25. doi: 10.7326/m20-3213. PubMed PMID: 32579379; PubMed Central PMCID: PMC7322812.
2. van den Broek-Altburg EM, Atherly AJ, Diehl SA, et al. Jobs, housing and mask-wearing: A cross-sectional study of risk factors for COVID-19. *JMIR Public Health Surveill.* 2020. Epub 2020/12/15. doi: 10.2196/24320. PubMed PMID: 33315576.
3. Venugopal U, Jilani N, Rabah S, et al. SARS-CoV-2 seroprevalence among health care workers in a new york city hospital: A cross-sectional analysis during the COVID-19 pandemic. *Int J Infect Dis.* 2021;102:63-9. Epub 2020/10/20. doi: 10.1016/j.ijid.2020.10.036. PubMed PMID: 33075539; PubMed Central PMCID: PMC7566823.
4. Bundgaard H, Bundgaard JS, Raaschou-Pedersen DET, et al. Effectiveness of adding a mask recommendation to other public health measures to prevent SARS-CoV-2 infection in Danish mask wearers. *Ann Intern Med.* 2020. doi: 10.7326/M20-6817.
5. Doung-Ngern P, Suphanchaimat R, Panjangampatthana A, et al. Case-control study of use of personal protective measures and risk for Severe Acute Respiratory Syndrome Coronavirus 2 infection, Thailand. *Emerg Infect Dis.* 2020;26(11). Epub 2020/09/16. doi: 10.3201/eid2611.203003. PubMed PMID: 32931726.
6. Wang Y, Tian H, Zhang L, et al. Reduction of secondary transmission of SARS-CoV-2 in households by face mask use, disinfection and social distancing: A cohort study in Beijing, China. *BMJ Glob Health.* 2020;5(5). Epub 2020/05/30. doi: 10.1136/bmjgh-2020-002794. PubMed PMID: 32467353.
7. Akinbami LJ, Vuong N, Petersen LR, et al. SARS-CoV-2 seroprevalence among healthcare, first response, and public safety personnel, Detroit Metropolitan Area, Michigan, USA, May-June 2020. *Emerg Infect Dis.* 2020;26(12). Epub 2020/09/22. doi: 10.3201/eid2612.203764. PubMed PMID: 32956614.
8. Chatterjee P, Anand T, Singh KJ, et al. Healthcare workers & SARS-CoV-2 infection in india: A case-control investigation in the time of COVID-19. *Indian J Med Res.* 2020;151(5):459-67. Epub 2020/07/03. doi: 10.4103/ijmr.IJMR\_2234\_20. PubMed PMID: 32611916.
9. Heinzerling A, Stuckey MJ, Scheuer T, et al. Transmission of COVID-19 to health care personnel during exposures to a hospitalized patient - Solano County, California, February 2020. *MMWR Morb Mortal Wkly Rep.* 2020;69(15):472-6. Epub 2020/04/17. doi: 10.15585/mmwr.mm6915e5. PubMed PMID: 32298249.
10. Khalil MM, Alam MM, Arefin MK, et al. Role of personal protective measures in prevention of COVID-19 spread among physicians in Bangladesh: A multicenter cross-sectional comparative study. *SN Compr Clin Med.* 2020:1-7. Epub 2020/09/10. doi: 10.1007/s42399-020-00471-1. PubMed PMID: 32904377; PubMed Central PMCID: PMC7454131.
11. Piapan L, De Michieli P, Ronchese F, et al. COVID-19 outbreak in healthcare workers in Trieste hospitals (northeastern Italy). *J Hosp Infect.* 2020. Epub 2020/08/18. doi: 10.1016/j.jhin.2020.08.012. PubMed PMID: 32805309; PubMed Central PMCID: PMC7427613.
12. Sims MD, Maine GN, Childers KL, et al. COVID-19 seropositivity and asymptomatic rates in healthcare workers are associated with job function and masking. *Clin Infect Dis* 2020. Epub 2020/11/06. doi: 10.1093/cid/ciaa1684. PubMed PMID: 33150375.

13. Wang X, Pan Z, Cheng Z. Association between 2019-nCoV transmission and N95 respirator use. *Journal Hosp Infect.* 2020(March 3). doi: 10.1016/j.jhin.2020.02.021.
14. Lau JT, Lau M, Kim JH, et al. Probable secondary infections in households of SARS patients in Hong Kong. *Emerg Infect Dis.* 2004c;10(2):235-43. Epub 2004/03/20. doi: 10.3201/eid1002.030626. PubMed PMID: 15030689; PubMed Central PMCID: PMC3322902.
15. Tuan PA, Horby P, Dinh PN, et al. SARS transmission in Vietnam outside of the health-care setting. *Epidemiol Infect.* 2007;135(3):392-401. Epub 2006/07/28. doi: 10.1017/s0950268806006996. PubMed PMID: 16870029; PubMed Central PMCID: PMC2870589.
16. Wu J, Xu F, Zhou W, et al. Risk factors for SARS among persons without known contact with SARS patients, Beijing, China. *Emerg Infect Dis.* 2004;10(2):210-6. doi: 10.3201/eid1002.030730. PubMed PMID: 15030685.
17. MacIntyre CR, Cauchemez S, Dwyer DE, et al. Face mask use and control of respiratory virus transmission in households. *Emerg Infect Dis.* 2009;15(2):233-41. Epub 2009/02/06. doi: 10.3201/eid1502.081167. PubMed PMID: 19193267; PubMed Central PMCID: PMC2662657.
18. Canini L, Andreoletti L, Ferrari P, et al. Surgical mask to prevent influenza transmission in households: A cluster randomized trial. *PloS One.* 2010;5(11):e13998. Epub 2010/11/26. doi: 10.1371/journal.pone.0013998. PubMed PMID: 21103330; PubMed Central PMCID: PMC2984432.
19. Cowling BJ, Chan KH, Fang VJ, et al. Facemasks and hand hygiene to prevent influenza transmission in households: A cluster randomized trial. *Ann Intern Med.* 2009;151(7):437-46. Epub 2009/08/05. doi: 10.7326/0003-4819-151-7-200910060-00142. PubMed PMID: 19652172.
20. Cowling BJ, Fung RO, Cheng CK, et al. Preliminary findings of a randomized trial of non-pharmaceutical interventions to prevent influenza transmission in households. *PloS One.* 2008;3(5):e2101. Epub 2008/05/08. doi: 10.1371/journal.pone.0002101. PubMed PMID: 18461182; PubMed Central PMCID: PMC2364646.
21. Larson EL, Ferng YH, Wong-McLoughlin J, et al. Impact of non-pharmaceutical interventions on uris and influenza in crowded, urban households. *Public Health Rep (Washington, DC : 1974).* 2010;125(2):178-91. Epub 2010/03/20. doi: 10.1177/003335491012500206. PubMed PMID: 20297744; PubMed Central PMCID: PMC2821845.
22. MacIntyre CR, Zhang Y, Chughtai AA, et al. Cluster randomised controlled trial to examine medical mask use as source control for people with respiratory illness. *BMJ Open.* 2016;6(12):e012330. Epub 2017/01/01. doi: 10.1136/bmjopen-2016-012330. PubMed PMID: 28039289; PubMed Central PMCID: PMC5223715.
23. Simmerman JM, Suntarattiwong P, Levy J, et al. Findings from a household randomized controlled trial of hand washing and face masks to reduce influenza transmission in Bangkok, Thailand. *Influenza Other Respir Viruses.* 2011;5(4):256-67. Epub 2011/06/10. doi: 10.1111/j.1750-2659.2011.00205.x. PubMed PMID: 21651736; PubMed Central PMCID: PMC4634545.
24. Suess T, Remschmidt C, Schink SB, et al. The role of facemasks and hand hygiene in the prevention of influenza transmission in households: Results from a cluster randomised trial; Berlin, Germany, 2009-2011. *BMC Infect Dis.* 2012;12:26. Epub 2012/01/28. doi: 10.1186/1471-2334-12-26. PubMed PMID: 22280120; PubMed Central PMCID: PMC3285078.

25. Aiello AE, Murray GF, Perez V, et al. Mask use, hand hygiene, and seasonal influenza-like illness among young adults: A randomized intervention trial. *J Infect Dis.* 2010;201(4):491-8. Epub 2010/01/22. doi: 10.1086/650396. PubMed PMID: 20088690.
26. Aiello AE, Perez V, Coulborn RM, et al. Facemasks, hand hygiene, and influenza among young adults: A randomized intervention trial. *PloS One.* 2012;7(1):e29744. Epub 2012/02/02. doi: 10.1371/journal.pone.0029744. PubMed PMID: 22295066; PubMed Central PMCID: PMC3266257.
27. Alfelali M, Haworth EA, Barasheed O, et al. Facemask versus no facemask in preventing viral respiratory infections during hajj: A cluster randomised open label trial March 8, 2019. Available from: [https://papers.ssrn.com/sol3/papers.cfm?abstract\\_id=3349234](https://papers.ssrn.com/sol3/papers.cfm?abstract_id=3349234).
28. Liu W, Tang F, Fang L-Q, et al. Risk factors for SARS infection among hospital healthcare workers in Beijing: A case control study. *Trop Med Int Health.* 2009;14(s1):52-9. doi: 10.1111/j.1365-3156.2009.02255.x.
29. Loeb M, McGeer A, Henry B, et al. SARS among critical care nurses, Toronto. *Emerg Infect Dis.* 2004;10(2):251-5. Epub 2004/03/20. doi: 10.3201/eid1002.030838. PubMed PMID: 15030692; PubMed Central PMCID: PMC3322898.
30. Ma HJ, Wang HW, Fang LQ, et al. [A case-control study on the risk factors of severe acute respiratory syndromes among health care workers]. *Zhonghua liu xing bing xue za zhi = Zhonghua liuxingbingxue zazhi.* 2004;25(9):741-4. Epub 2004/11/24. PubMed PMID: 15555351.
31. Nishiura H, Kuratsuji T, Quy T, et al. Rapid awareness and transmission of severe acute respiratory syndrome in Hanoi French Hospital, Vietnam. *Am J Trop Med Hyg.* 2005;73(1):17-25. Epub 2005/07/15. PubMed PMID: 16014825.
32. Nishiyama A, Wakasugi N, Kirikae T, et al. Risk factors for SARS infection within hospitals in Hanoi, Vietnam. *Japanese journal of infectious diseases.* 2008;61(5):388-90. Epub 2008/09/23. PubMed PMID: 18806349.
33. Pei LY, Gao ZC, Yang Z, et al. [Investigation of the influencing factors on severe acute respiratory syndrome among health care workers]. *Beijing da xue xue bao Yi xue ban = Journal of Peking University Health Sciences.* 2006;38(3):271-5. Epub 2006/06/17. PubMed PMID: 16778970.
34. Raboud J, Shigayeva A, McGeer A, et al. Risk factors for SARS transmission from patients requiring intubation: A multicentre investigation in Toronto, Canada. *PloS One.* 2010;5(5):e10717. Epub 2010/05/27. doi: 10.1371/journal.pone.0010717. PubMed PMID: 20502660; PubMed Central PMCID: PMC2873403.
35. Seto WH, Tsang D, Yung RW, et al. Effectiveness of precautions against droplets and contact in prevention of nosocomial transmission of severe acute respiratory syndrome (SARS). *Lancet.* 2003;361(9368):1519-20. Epub 2003/05/10. doi: 10.1016/s0140-6736(03)13168-6. PubMed PMID: 12737864; PubMed Central PMCID: PMC7112437.
36. Telean MD, Boudville IC, Heng BH, et al. Factors associated with transmission of severe acute respiratory syndrome among health-care workers in Singapore. *Epidemiol Infect.* 2004;132(5):797-803. Epub 2004/10/12. doi: 10.1017/s0950268804002766. PubMed PMID: 15473141; PubMed Central PMCID: PMC2870165.
37. Wilder-Smith A, Telean MD, Heng BH, et al. Asymptomatic SARS coronavirus infection among healthcare workers, Singapore. *Emerg Infect Dis.* 2005;11(7):1142-5. Epub 2005/07/19. doi: 10.3201/eid1107.041165. PubMed PMID: 16022801; PubMed Central PMCID: PMC3371799.

38. Yin WW, Gao LD, Lin WS, et al. [Effectiveness of personal protective measures in prevention of nosocomial transmission of severe acute respiratory syndrome]. *Zhonghua liu xing bing xue za zhi = Zhonghua liuxingbingxue zazhi*. 2004;25(1):18-22. Epub 2004/04/06. PubMed PMID: 15061941.
39. Scales DC, Green K, Chan AK, et al. Illness in intensive care staff after brief exposure to severe acute respiratory syndrome. *Emerg Infect Dis*. 2003;9(10):1205-10. Epub 2003/11/12. doi: 10.3201/eid0910.030525. PubMed PMID: 14609453; PubMed Central PMCID: PMC3033076.
40. Alraddadi BM, Al-Salmi HS, Jacobs-Slifka K, et al. Risk factors for middle east respiratory syndrome coronavirus infection among healthcare personnel. *Emerg Infect Dis*. 2016;22(11):1915-20. Epub 2016/10/22. doi: 10.3201/eid2211.160920. PubMed PMID: 27767011; PubMed Central PMCID: PMC5088034.
41. Lau JTF, Fung KS, Wong TW, et al. SARS transmission among hospital workers in hong kong. *Emerg Infect Dis*. 2004b;10(2):280-6. doi: 10.3201/eid1002.030534. PubMed PMID: 15030698.
42. Caputo KM, Byrick R, Chapman MG, et al. Intubation of SARS patients: Infection and perspectives of healthcare workers. *Can J Anaesth*. 2006;53(2):122-9. Epub 2006/01/26. doi: 10.1007/bf03021815. PubMed PMID: 16434750.
43. Loeb M, Dafoe N, Mahony J, et al. Surgical mask vs N95 respirator for preventing influenza among health care workers: A randomized trial. *JAMA*. 2009;302(17):1865-71. Epub 2009/10/03. doi: 10.1001/JAMA.2009.1466. PubMed PMID: 19797474.
44. MacIntyre CR, Wang Q, Cauchemez S, et al. A cluster randomized clinical trial comparing fit-tested and non-fit-tested N95 respirators to medical masks to prevent respiratory virus infection in health care workers. *Influenza Other Respir Viruses*. 2011;5(3):170-9. Epub 2011/04/12. doi: 10.1111/j.1750-2659.2011.00198.x. PubMed PMID: 21477136; PubMed Central PMCID: PMC4941587.
45. MacIntyre CR, Wang Q, Seale H, et al. A randomized clinical trial of three options for N95 respirators and medical masks in health workers. *Am J Respir Crit Care Med*. 2013;187(9):960-6. Epub 2013/02/16. doi: 10.1164/rccm.201207-1164OC. PubMed PMID: 23413265.
46. MacIntyre CR, Seale H, Dung TC, et al. A cluster randomised trial of cloth masks compared with medical masks in healthcare workers. *BMJ Open*. 2015;5(4):e006577. Epub 2015/04/24. doi: 10.1136/bmjopen-2014-006577. PubMed PMID: 25903751; PubMed Central PMCID: PMC4420971.
47. Radonovich LJ, Jr., Simberkoff MS, Bessesen MT, et al. N95 respirators vs medical masks for preventing influenza among health care personnel: A randomized clinical trial. *JAMA*. 2019;322(9):824-33. Epub 2019/09/04. doi: 10.1001/JAMA.2019.11645. PubMed PMID: 31479137; PubMed Central PMCID: PMC6724169
